# Supplementary material for: Effect of cereal soaking and carbohydrase supplementation on growth, nutrient digestibility and intestinal microbiota in liquid-fed grow-finishing pigs
Source: PubMed Central journal article supplement (PMC6978375; doi:10.1038/s41598-020-57668-6), 2020-01-23
Supplement: 41598_2020_57668_MOESM1_ESM.pdf [file 41598_2020_57668_MOESM1_ESM.pdf]

## Supporting information for:

### **“Effect of cereal soaking and carbohydrase supplementation on growth, nutrient digestibility and intestinal microbiota in liquid-fed grow-finishing pigs”**

Alberto Torres-Pitarch<sup>1,2</sup>, Gillian E. Gardiner<sup>3</sup>, Paul Cormican<sup>4</sup>, Mary Rea<sup>5,6</sup>, Fiona Crispie<sup>5,6</sup>, John V. O’Doherty<sup>2</sup>, Pierre Cozannet<sup>7</sup>, Tomas Ryan<sup>1</sup>, and Peadar G. Lawlor<sup>1\*</sup>

<sup>1</sup>Teagasc, Pig Development Department, Animal and Grassland Research and Innovation Centre, Moorepark, Fermoy, County Cork, Ireland

<sup>2</sup>School of Agriculture and Food Science, University College Dublin, Belfield, Dublin, Ireland

<sup>3</sup>Department of Science, Waterford Institute of Technology, Waterford, Ireland

<sup>4</sup>Animal and Bioscience Research Department, Animal and Grassland Research and Innovation Centre, Teagasc, Grange, County Meath, Ireland

<sup>5</sup>Teagasc Food Research Centre, Moorepark, Fermoy, County Cork, Ireland

<sup>6</sup>APC Microbiome Ireland, University College Cork, Cork, Ireland

<sup>7</sup>Adisseo France SAS, Antony, France

\*Correspondence: [peadar.lawlor@teagasc.ie](mailto:peadar.lawlor@teagasc.ie)

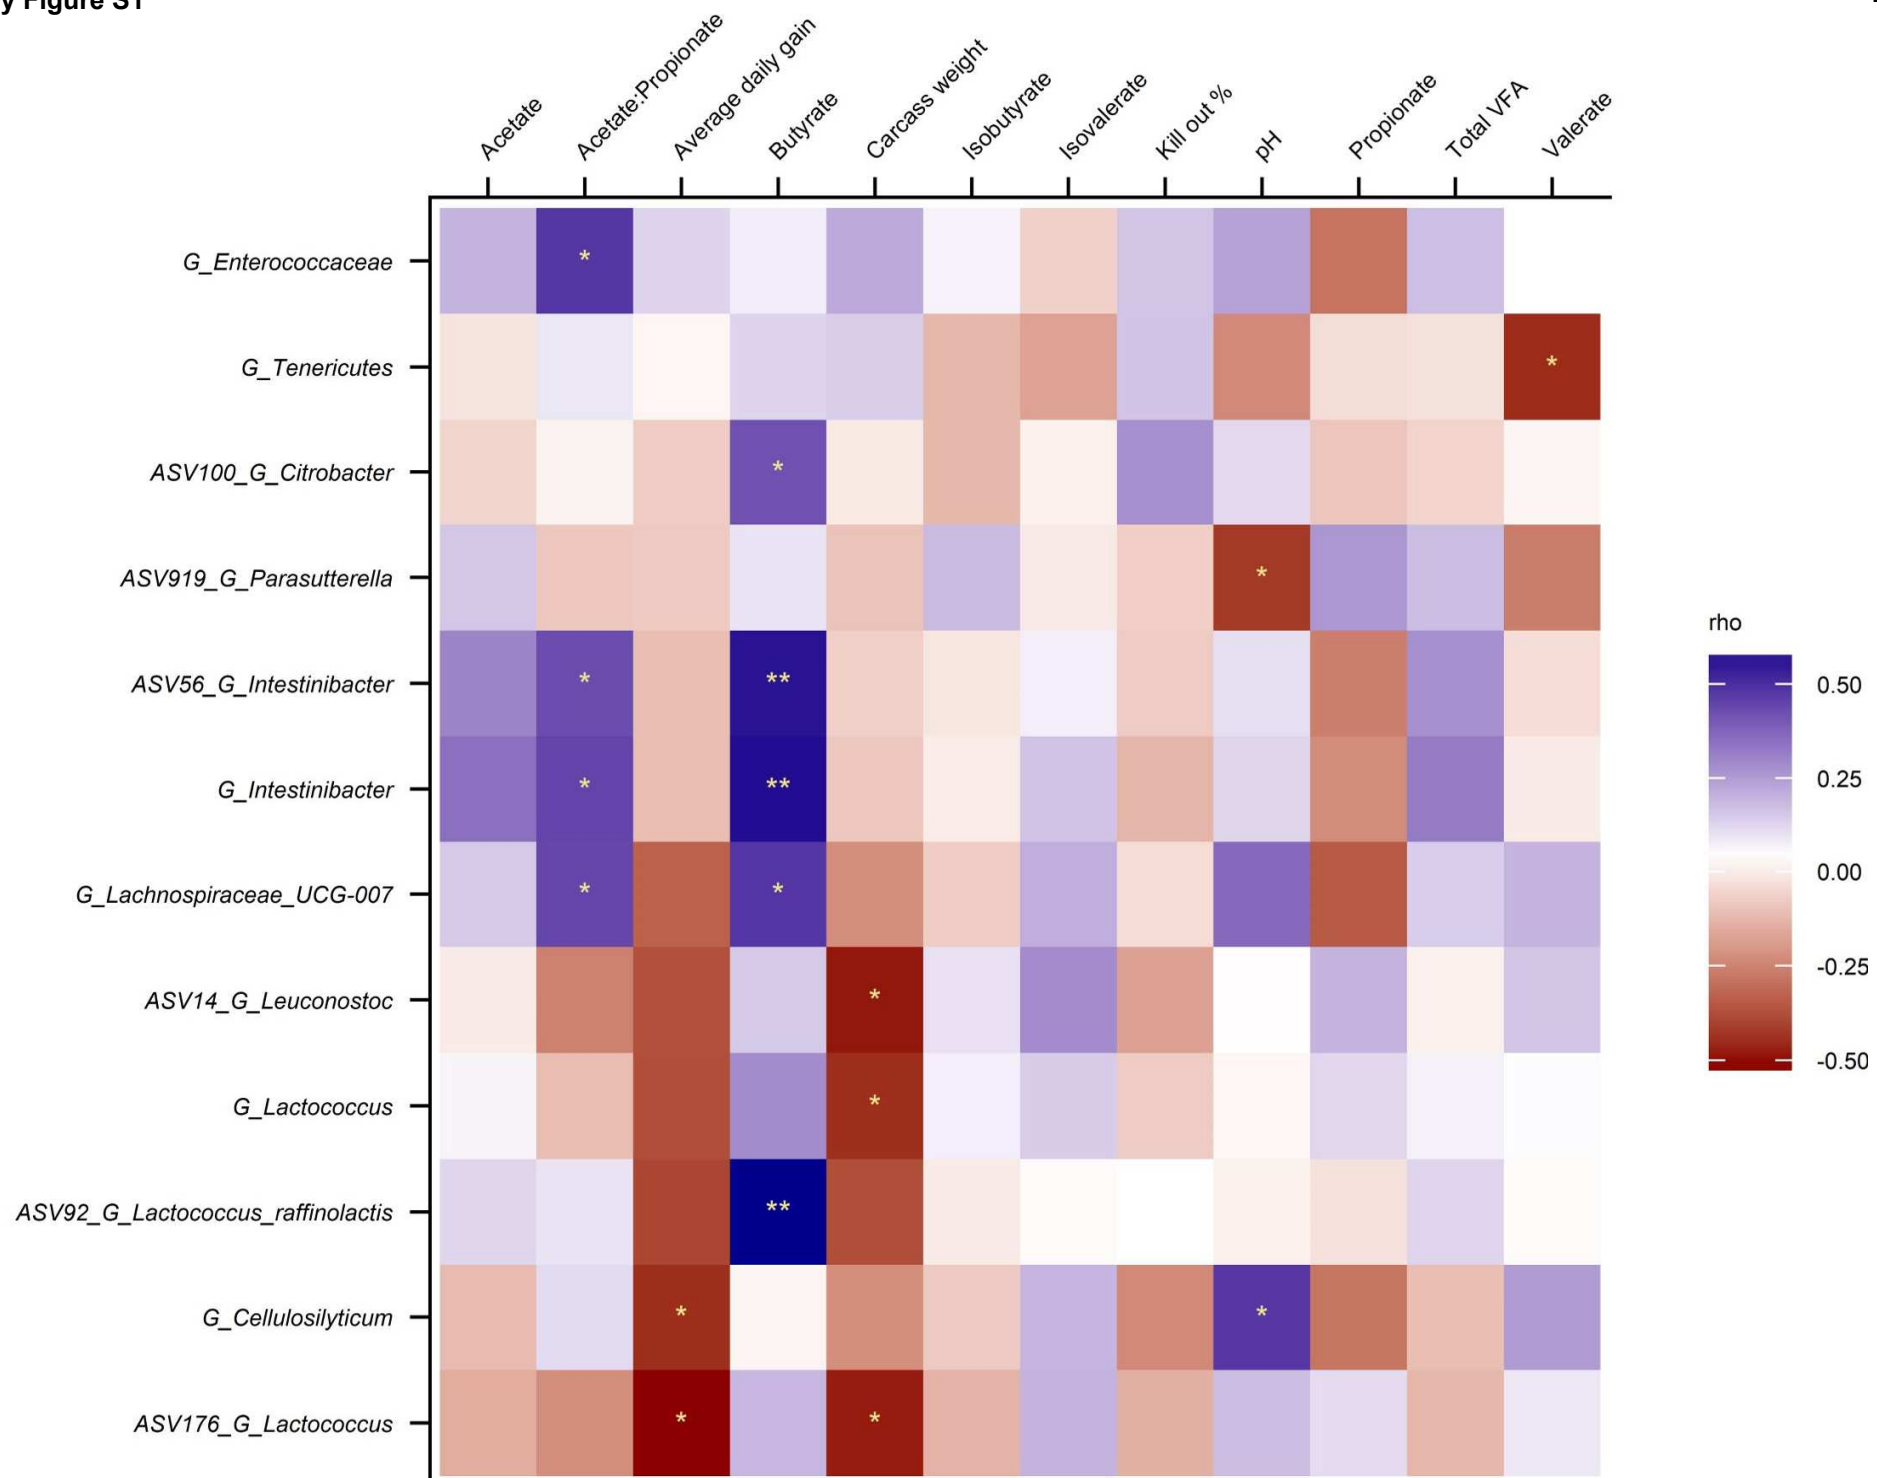

**Supplementary Figure S1.** Spearman correlation between all ileal taxa with differential relative abundance and all variables measured in the pigs. Positive correlations are indicated in blue and negative correlations are indicated in red. Significant correlations are indicated with asterisks (P<0.05 = \*, P<0.01 = \*\*, P<0.001 = \*\*\*).

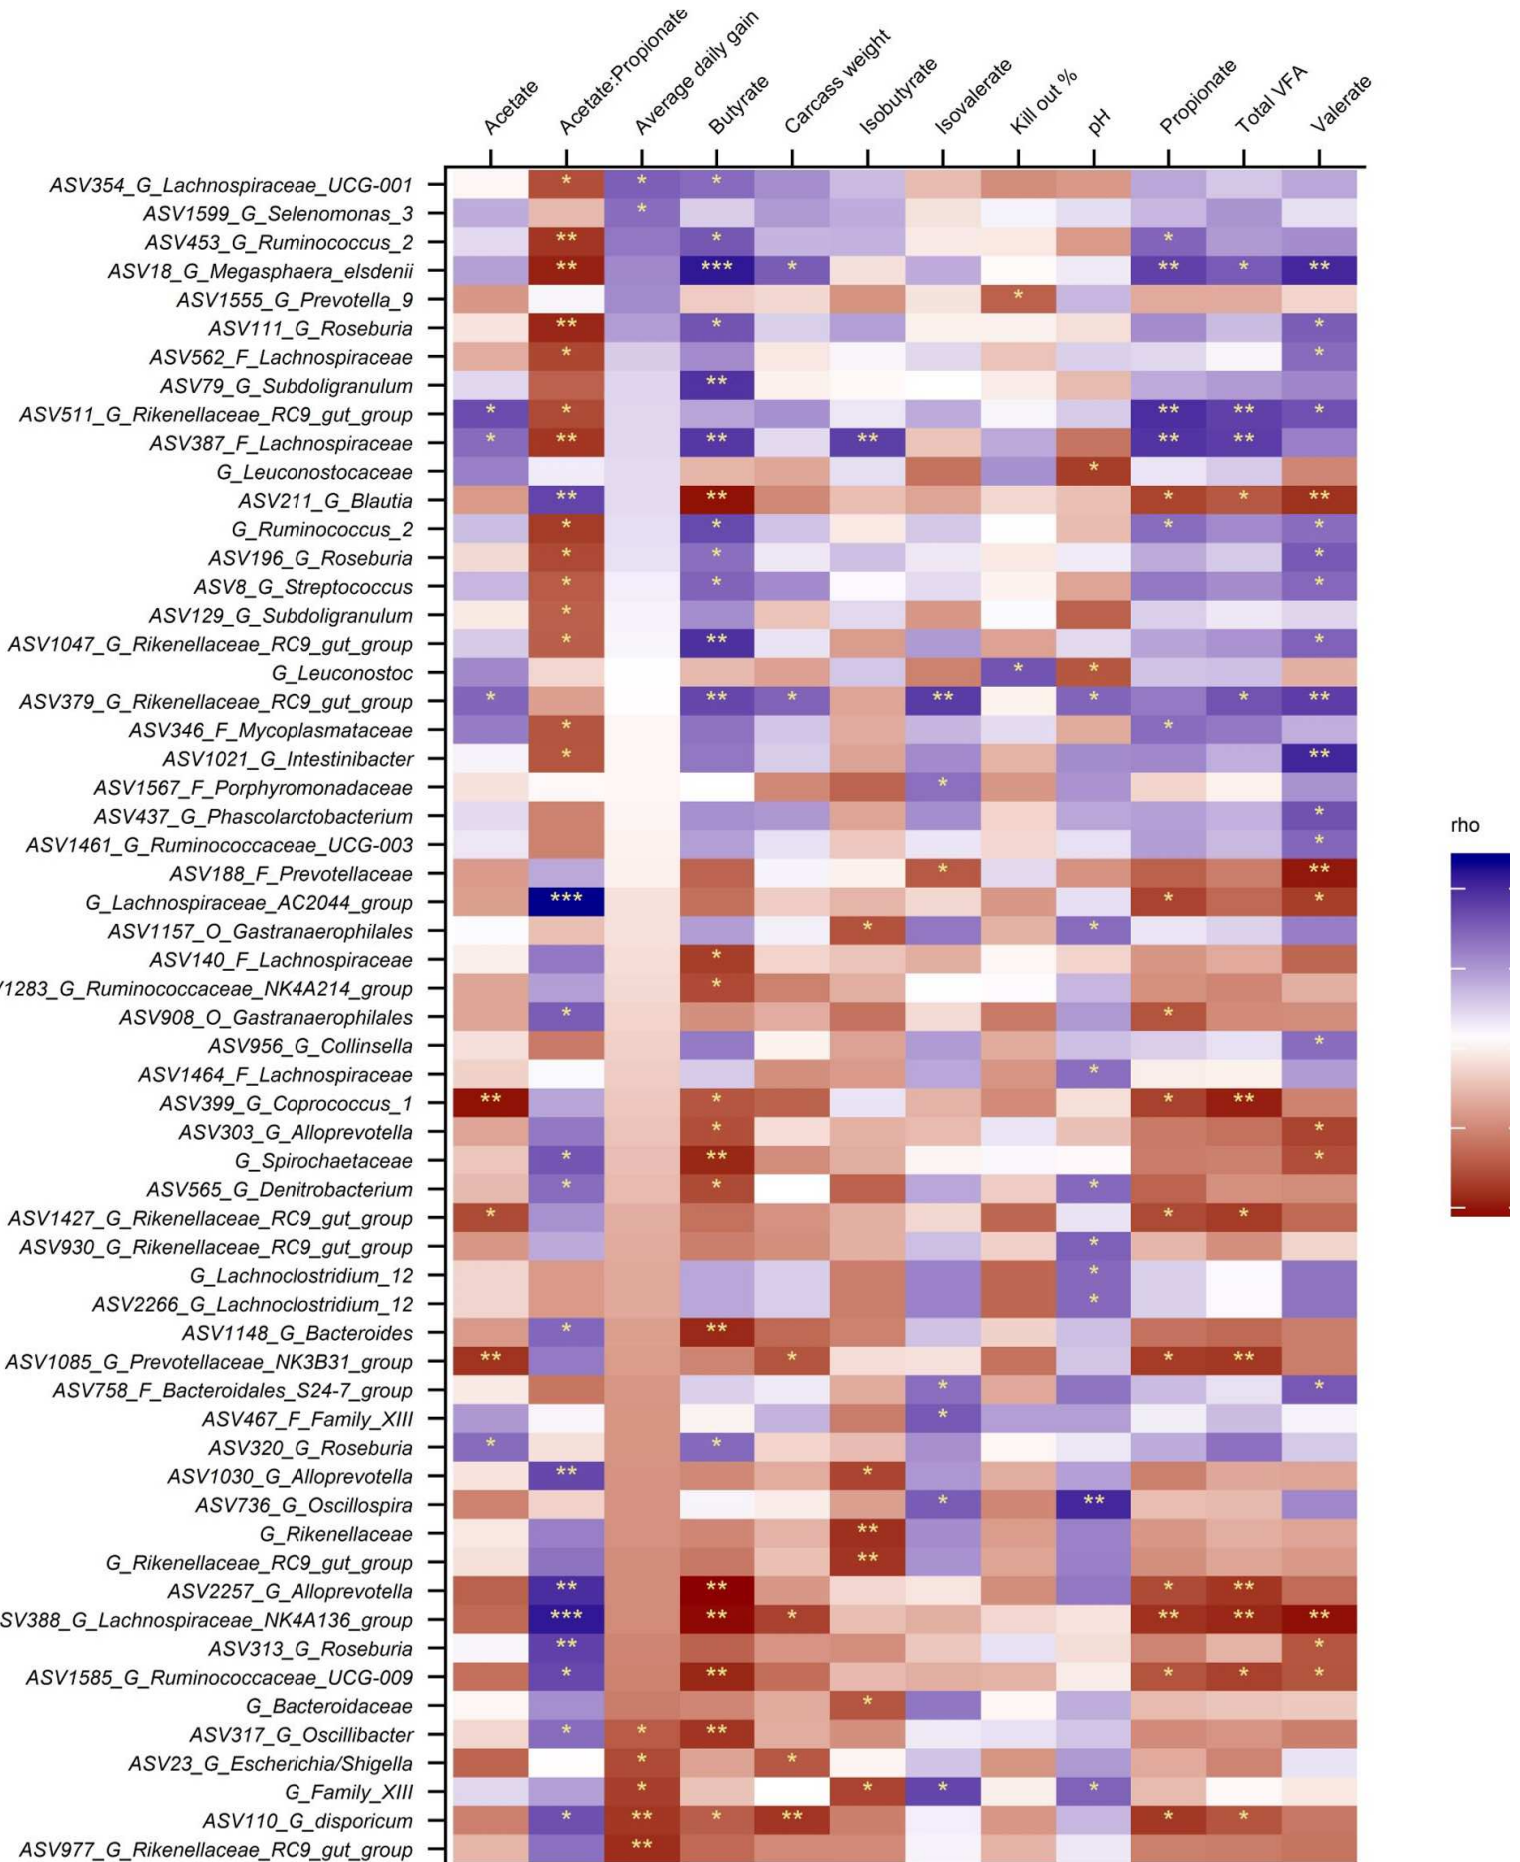

Supplementary Figure S2. Spearman correlation between all caecal taxa with differential relative abundance and all variables measured in the pigs. Positive correlations are indicated in blue and negative correlations are indicated in red. Significant correlations are indicated with asterisks (P<0.05 = \*, P<0.01 = \*\*, P<0.001 = \*\*\*).

**Table S1** Relative abundance (%) of microbial amplicon sequence variants (ASV) differentially abundant according to dietary treatment in the ileal and caecal digesta of pigs (.xls file)<sup>1</sup>

| <i>Cereal form (C<sub>soak</sub>)</i> <sup>2</sup> : | <b>Fresh</b>                         |         | <b>Soak</b> |         | <b>SEM</b> <sup>4</sup> | <b>P-value</b> <sup>5</sup> |                         |                             |
|------------------------------------------------------|--------------------------------------|---------|-------------|---------|-------------------------|-----------------------------|-------------------------|-----------------------------|
|                                                      | <i>Enzyme (ENZ)</i> <sup>3</sup> : - | +       | -           | +       |                         | <b>ENZ</b>                  | <b>C<sub>soak</sub></b> | <b>ENZ*C<sub>soak</sub></b> |
| <b>Ileum</b>                                         |                                      |         |             |         |                         |                             |                         |                             |
| ASV176                                               | 0.02b                                | 0.02b   | 0.08a       | 0.09a   | 0.020                   | <0.001                      | 0.940                   | 0.030                       |
| ASV92                                                | 0.05b                                | 0.04b   | 0.17a       | 0.21a   | 0.044                   | <0.001                      | 0.890                   | <0.001                      |
| ASV100                                               | 0.12b                                | 0.09b   | 0.27a       | 0.25a   | 0.040                   | <0.001                      | 0.880                   | <0.001                      |
| ASV56                                                | 0.56a,b                              | 0.06c   | 0.15c b     | 0.83a   | 0.282                   | 0.700                       | 0.880                   | <0.001                      |
| ASV66                                                | 0.06b                                | 0.11b   | 0.46a       | 0.55a   | 0.163                   | <0.001                      | 0.880                   | <0.001                      |
| ASV14                                                | 0.1b                                 | 0.22a,b | 0.52a       | 0.69a   | 0.206                   | <0.001                      | 0.870                   | 0.030                       |
| ASV919                                               | 0.01b                                | 0 c     | 0.03b       | 0.1a    | 0.028                   | 0.070                       | 0.870                   | <0.001                      |
| ASV186                                               | 0.09a,b                              | 0.05b   | 0.15a       | 0.12a   | 0.023                   | 0.070                       | 0.580                   | 0.030                       |
| ASV22                                                | 0.04c                                | 0.11c b | 0.32a,b     | 1.11a   | 0.496                   | <0.001                      | 0.400                   | <0.001                      |
| <b>Caecum</b>                                        |                                      |         |             |         |                         |                             |                         |                             |
| ASV1567                                              | 0.03a,b                              | 0.04a,b | 0.06a       | 0.02b   | 0.017                   | 0.920                       | 0.740                   | 0.040                       |
| ASV984                                               | 0.01a                                | 0.23a   | 0.01a       | 0.04a   | 0.080                   | 0.530                       | 0.240                   | 0.040                       |
| ASV1157                                              | 0.06a,b                              | 0.02b   | 0.1a        | 0.08a,b | 0.024                   | 0.500                       | 0.560                   | 0.040                       |
| ASV1659                                              | 0.02a                                | 0.03a   | 0.03a       | 0.05a   | 0.007                   | 0.410                       | 0.390                   | 0.040                       |
| ASV1174                                              | 0.03b                                | 0.04a,b | 0.09a       | 0.05a,b | 0.016                   | 0.410                       | 0.590                   | 0.040                       |
| ASV884                                               | 0.08a,b                              | 0.06a,b | 0.06b       | 0.16a   | 0.034                   | 0.790                       | 0.530                   | 0.040                       |
| ASV110                                               | 0.14a,b                              | 0.15a,b | 0.07b       | 0.18a   | 0.038                   | 0.890                       | 0.340                   | 0.040                       |
| ASV1203                                              | 0.02a                                | 0.47a   | 0.1a        | 0.09a   | 0.104                   | 0.660                       | 0.550                   | 0.040                       |
| ASV1070                                              | 0.06a                                | 0.05a   | 0.12a       | 0.04a   | 0.013                   | 0.570                       | 0.510                   | 0.040                       |
| ASV1153                                              | 0.04a,b                              | 0.03b   | 0.06a       | 0.05a,b | 0.009                   | 0.410                       | 0.490                   | 0.040                       |
| ASV1151                                              | 0.11a                                | 0.04a,b | 0.07a,b     | 0.01b   | 0.038                   | 0.840                       | 0.280                   | 0.040                       |
| ASV237                                               | 0.11b                                | 0.69a   | 0.17a,b     | 0.2a,b  | 0.260                   | 0.590                       | 0.280                   | 0.040                       |
| ASV1074                                              | 0.05b                                | 0.12a   | 0.07a,b     | 0.06a,b | 0.022                   | 0.680                       | 0.390                   | 0.040                       |
| ASV1890                                              | 0.01a                                | 0.04a   | 0.02a       | 0.03a   | 0.011                   | 0.980                       | 0.260                   | 0.040                       |
| ASV1014                                              | 0.05a                                | 0.03a   | 0.08a       | 0.09a   | 0.022                   | 0.410                       | 0.960                   | 0.030                       |
| ASV760                                               | 0.03a                                | 0.03a   | 0.06a       | 0.09a   | 0.027                   | 0.320                       | 0.640                   | 0.030                       |
| ASV326                                               | 0.09a                                | 0.21a   | 0.17a       | 0.21a   | 0.042                   | 0.790                       | 0.320                   | 0.030                       |
| ASV1863                                              | 0.05a                                | 0.02a   | 0.04a       | 0.02a   | 0.004                   | 0.990                       | 0.120                   | 0.030                       |
| ASV256                                               | 0.28a                                | 0.12a   | 0.18a       | 0.26a   | 0.064                   | 0.860                       | 0.710                   | 0.030                       |
| ASV188                                               | 0.16b                                | 0.37a   | 0.31a,b     | 0.24a,b | 0.069                   | 0.970                       | 0.630                   | 0.030                       |
| ASV1427                                              | 0.03a,b                              | 0.04a,b | 0.02b       | 0.05a   | 0.007                   | 0.990                       | 0.240                   | 0.030                       |
| ASV1096                                              | 0.03b                                | 0.03a,b | 0.07a       | 0.05a,b | 0.012                   | 0.330                       | 0.590                   | 0.030                       |
| ASV1660                                              | 0.03a,b                              | 0.03a,b | 0.14a       | 0.02b   | 0.032                   | 0.530                       | 0.530                   | 0.030                       |
| ASV440                                               | 0.14a                                | 0.29a   | 0.09a       | 0.12a   | 0.055                   | 0.410                       | 0.440                   | 0.030                       |
| ASV1021                                              | 0.08a                                | 0.05a,b | 0.07a,b     | 0.04b   | 0.007                   | 0.680                       | 0.280                   | 0.030                       |
| ASV511                                               | 0.08b                                | 0.13a,b | 0.14a       | 0.12a,b | 0.021                   | 0.500                       | 0.640                   | 0.030                       |
| ASV1283                                              | 0.02b                                | 0.08a   | 0.06a,b     | 0.07a,b | 0.024                   | 0.980                       | 0.340                   | 0.030                       |
| ASV1460                                              | 0.04a                                | 0.09a   | 0.03a       | 0.03a   | 0.011                   | 0.410                       | 0.620                   | 0.030                       |
| ASV970                                               | 0.06a,b                              | 0.06a,b | 0.16a       | 0.05b   | 0.023                   | 0.550                       | 0.350                   | 0.030                       |
| ASV565                                               | 0.07b                                | 0.11a,b | 0.1a,b      | 0.16a   | 0.022                   | 0.410                       | 0.290                   | 0.030                       |

| <i>Cereal form (C<sub>soak</sub>)<sup>2</sup>:</i> | <i>Fresh</i> |          | <i>Soak</i> |          | <i>SEM<sup>4</sup></i> | <i>P-value<sup>5</sup></i> |                         |                             |
|----------------------------------------------------|--------------|----------|-------------|----------|------------------------|----------------------------|-------------------------|-----------------------------|
|                                                    | <i>-</i>     | <i>+</i> | <i>-</i>    | <i>+</i> |                        | <i>ENZ</i>                 | <i>C<sub>soak</sub></i> | <i>ENZ*C<sub>soak</sub></i> |
| <i>Enzyme (ENZ)<sup>3</sup>:</i>                   | <i>-</i>     | <i>+</i> | <i>-</i>    | <i>+</i> |                        |                            |                         |                             |
| ASV23                                              | 0.07a,b      | 0.95a    | 0.04a,b     | 0.02b    | 0.452                  | 0.470                      | 0.280                   | 0.030                       |
| ASV359                                             | 0.15a        | 0.05a    | 0.09a       | 0.03a    | 0.029                  | 0.810                      | 0.240                   | 0.030                       |
| ASV18                                              | 2.55a        | 0.91b    | 2.32a,b     | 1.25a,b  | 0.619                  | 0.980                      | 0.160                   | 0.030                       |
| ASV471                                             | 0.2a         | 0.1a     | 0.16a       | 0.09a    | 0.027                  | 0.800                      | 0.140                   | 0.030                       |
| ASV933                                             | 0.06a,b      | 0.1a,b   | 0.05b       | 0.12a    | 0.025                  | 0.680                      | 0.140                   | 0.030                       |
| ASV658                                             | 0.09a,b      | 0.08a,b  | 0.07b       | 0.18a    | 0.039                  | 0.850                      | 0.380                   | 0.030                       |
| ASV303                                             | 0.11b        | 0.21a,b  | 0.11a,b     | 0.7a     | 0.253                  | 0.410                      | 0.240                   | 0.030                       |
| ASV1555                                            | 0.01b        | 0.02a,b  | 0.08a       | 0.03a,b  | 0.029                  | 0.410                      | 0.920                   | 0.020                       |
| ASV812                                             | 0.12a        | 0.07a,b  | 0.05b       | 0.06a,b  | 0.013                  | 0.410                      | 0.550                   | 0.020                       |
| ASV424                                             | 0.08b        | 0.1a,b   | 0.14a,b     | 0.2a     | 0.035                  | 0.330                      | 0.600                   | 0.020                       |
| ASV202                                             | 0.19a,b      | 0.47a    | 0.24a,b     | 0.16b    | 0.100                  | 0.540                      | 0.470                   | 0.020                       |
| ASV1047                                            | 0.04a,b      | 0.01b    | 0.07a       | 0.03a,b  | 0.018                  | 0.500                      | 0.280                   | 0.020                       |
| ASV607                                             | 0.22a        | 0.06a    | 0.06a       | 0.03a    | 0.050                  | 0.410                      | 0.280                   | 0.020                       |
| ASV8                                               | 1.39a,b      | 0.77a,b  | 2.02a       | 0.36b    | 0.738                  | 0.980                      | 0.240                   | 0.020                       |
| ASV28                                              | 1.26a        | 0.44a    | 1.22a       | 0.52a    | 0.336                  | 0.990                      | 0.120                   | 0.020                       |
| ASV863                                             | 0a           | 0.24a    | 0.26a       | 0.2a     | 0.137                  | 0.980                      | 0.780                   | 0.020                       |
| ASV379                                             | 0.11b        | 0.15a,b  | 0.22a       | 0.19a,b  | 0.038                  | 0.410                      | 0.740                   | 0.020                       |
| ASV703                                             | 0.6a         | 0.08b    | 0.15a,b     | 0.14a,b  | 0.255                  | 0.970                      | 0.280                   | 0.020                       |
| ASV907                                             | 0.03b        | 0.09a,b  | 0.05a,b     | 0.09a    | 0.026                  | 0.840                      | 0.270                   | 0.020                       |
| ASV387                                             | 0.13a,b      | 0.09a,b  | 0.18a       | 0.08b    | 0.025                  | 0.760                      | 0.160                   | 0.020                       |
| ASV166                                             | 0.18a        | 0.1a     | 0.16a       | 0.09a    | 0.029                  | 0.950                      | 0.120                   | 0.020                       |
| ASV134                                             | 0.53a,b      | 0.27b    | 0.64a,b     | 0.85a    | 0.181                  | 0.450                      | 0.950                   | 0.010                       |
| ASV758                                             | 0.06a,b      | 0.1a     | 0.08a       | 0.02b    | 0.017                  | 0.910                      | 0.760                   | 0.010                       |
| ASV1461                                            | 0.06a        | 0.02b    | 0.03a,b     | 0.02b    | 0.008                  | 0.680                      | 0.280                   | 0.010                       |
| ASV611                                             | 0.05b        | 0.18a    | 0.08a,b     | 0.14a,b  | 0.046                  | 0.970                      | 0.160                   | 0.010                       |
| ASV1464                                            | 0.05a        | 0.01b    | 0.04a,b     | 0.06a    | 0.018                  | 0.730                      | 0.800                   | 0.010                       |
| ASV399                                             | 0.17a,b      | 0.24a    | 0.12a,b     | 0.1b     | 0.035                  | 0.320                      | 0.640                   | 0.010                       |
| ASV1492                                            | 0.01a        | 0.05a    | 0.05a       | 0.04a    | 0.016                  | 0.620                      | 0.530                   | 0.010                       |
| ASV977                                             | 0.03b        | 0.09a    | 0.07a,b     | 0.11a    | 0.017                  | 0.680                      | 0.280                   | 0.010                       |
| ASV453                                             | 0.14a        | 0.05b    | 0.12a,b     | 0.07a,b  | 0.029                  | 0.990                      | 0.120                   | 0.010                       |
| ASV771                                             | 0.02b        | 0.1a     | 0.11a       | 0.12a    | 0.038                  | 0.660                      | 0.640                   | 0.010                       |
| ASV196                                             | 0.56a        | 0.13b    | 0.26a,b     | 0.24a,b  | 0.126                  | 0.620                      | 0.280                   | 0.010                       |
| ASV467                                             | 0.07b        | 0.13a,b  | 0.14a,b     | 0.2a     | 0.029                  | 0.410                      | 0.470                   | 0.010                       |
| ASV736                                             | 0.08a,b      | 0.12a    | 0.05b       | 0.07a,b  | 0.018                  | 0.410                      | 0.450                   | 0.010                       |
| ASV388                                             | 0.08b        | 0.33a    | 0.08b       | 0.16a,b  | 0.079                  | 0.570                      | 0.140                   | 0.010                       |
| ASV859                                             | 0.07a,b      | 0.12a    | 0.14a       | 0.06b    | 0.016                  | 0.990                      | 0.680                   | 0.010                       |
| ASV1030                                            | 0.03b        | 0.15a    | 0.07a,b     | 0.06a,b  | 0.034                  | 0.610                      | 0.470                   | 0.010                       |
| ASV1085                                            | 0.07a,b      | 0.07a    | 0.04b       | 0.09a    | 0.006                  | 0.980                      | 0.470                   | 0.010                       |
| ASV270                                             | 0.11b        | 0.16a,b  | 0.17a,b     | 0.41a    | 0.105                  | 0.410                      | 0.280                   | 0.010                       |
| ASV956                                             | 0.04a,b      | 0.03a,b  | 0.07a       | 0.03b    | 0.009                  | 0.950                      | 0.240                   | 0.010                       |
| ASV79                                              | 0.79a,b      | 0.55b    | 0.94a       | 0.54b    | 0.118                  | 0.870                      | 0.120                   | 0.010                       |
| ASV140                                             | 0.14b        | 1.04a    | 0.63a,b     | 0.52a,b  | 0.287                  | 0.890                      | 0.460                   | 0.010                       |
| ASV111                                             | 0.65a        | 0.2b     | 0.54a       | 0.49a,b  | 0.123                  | 0.970                      | 0.340                   | 0.010                       |
| ASV532                                             | 0.62a        | 0.07b    | 0.11a,b     | 0.05b    | 0.239                  | 0.600                      | 0.260                   | 0.010                       |

| <i>Cereal form (C<sub>soak</sub>)</i> <sup>2</sup> : | Fresh                         |         | Soak    |         | SEM <sup>4</sup> | <i>P</i> -value <sup>5</sup> |                   |                       |
|------------------------------------------------------|-------------------------------|---------|---------|---------|------------------|------------------------------|-------------------|-----------------------|
|                                                      | Enzyme (ENZ) <sup>3</sup> : - | +       | -       | +       |                  | ENZ                          | C <sub>soak</sub> | ENZ*C <sub>soak</sub> |
| ASV129                                               | 0.63a                         | 0.26b   | 0.48a,b | 0.26b   | 0.124            | 0.860                        | 0.120             | 0.010                 |
| ASV1093                                              | 0.19a                         | 0.14a   | 0.02b   | 0.09a   | 0.032            | 0.530                        | 0.950             | 0.010                 |
| ASV313                                               | 0.05b                         | 0.26a   | 0.49a   | 0.22a,b | 0.148            | 0.640                        | 0.680             | 0.010                 |
| ASV273                                               | 0.16a,b                       | 0.1b    | 0.17a,b | 0.38a   | 0.086            | 0.410                        | 0.570             | 0.010                 |
| ASV1148                                              | 0.01b                         | 0.06a   | 0.06a,b | 0.08a   | 0.022            | 0.680                        | 0.460             | 0.010                 |
| ASV930                                               | 0.04a,b                       | 0.07a,b | 0.03b   | 0.1a    | 0.021            | 0.930                        | 0.120             | 0.010                 |
| ASV211                                               | 0.13b                         | 0.57a   | 0.14b   | 0.25a,b | 0.168            | 0.580                        | 0.120             | 0.010                 |
| ASV1585                                              | 0.01b                         | 0.05a   | 0.05a   | 0.02a,b | 0.012            | 0.870                        | 0.850             | 0.010                 |
| ASV1376                                              | 0.05a                         | 0.06a   | 0.05a   | 0.01b   | 0.013            | 0.640                        | 0.670             | 0.010                 |
| ASV962                                               | 0.06b                         | 0.06b   | 0.18a   | 0.04b   | 0.028            | 0.410                        | 0.470             | 0.010                 |
| ASV559                                               | 0.03b                         | 0.09a,b | 0.07a,b | 0.14a   | 0.032            | 0.410                        | 0.240             | 0.010                 |
| ASV346                                               | 0.21a                         | 0.03b   | 0.18a   | 0.19a   | 0.075            | 0.730                        | 0.630             | 0.010                 |
| ASV16                                                | 0.11b                         | 0.73a   | 0.07b   | 0.08b   | 0.293            | 0.290                        | 0.240             | 0.010                 |
| ASV1599                                              | 0.07a                         | 0.12a   | 0.05a   | 0.02b   | 0.014            | 0.490                        | 0.870             | <0.001                |
| ASV20                                                | 0.02b                         | 0.02b   | 0.08a   | 0.05a,b | 0.017            | 0.000                        | 0.720             | <0.001                |
| ASV1364                                              | 0.08a                         | 0.06a   | 0.04a   | 0.02b   | 0.004            | 0.410                        | 0.640             | <0.001                |
| ASV437                                               | 0.12a,b                       | 0.08b   | 0.27a   | 0.08b   | 0.057            | 0.600                        | 0.120             | <0.001                |
| ASV290                                               | 0.09b                         | 0.11b   | 0.19a,b | 0.29a   | 0.048            | 0.180                        | 0.500             | <0.001                |
| ASV354                                               | 0.3a                          | 0.16a,b | 0.11b   | 0.13b   | 0.043            | 0.180                        | 0.470             | <0.001                |
| ASV926                                               | 0.05b                         | 0.1a    | 0.08a   | 0.09a   | 0.007            | 0.900                        | 0.300             | <0.001                |
| ASV209                                               | 0.65a                         | 0.15b   | 0.11b   | 0.13b   | 0.194            | 0.320                        | 0.270             | <0.001                |
| ASV1412                                              | 0.01b                         | 0.04a   | 0.04a   | 0.02a,b | 0.005            | 0.790                        | 0.810             | <0.001                |
| ASV908                                               | 0.01b                         | 0.1a    | 0.1a    | 0.12a   | 0.014            | 0.650                        | 0.640             | <0.001                |
| ASV1683                                              | 0.01 c                        | 0.06b   | 0.02 c  | 0.28a   | 0.039            | 0.620                        | 0.230             | <0.001                |
| ASV320                                               | 0.36a                         | 0.05c   | 0.19a,b | 0.1c b  | 0.108            | 0.840                        | 0.120             | <0.001                |
| ASV957                                               | 0.02b                         | 0.07a   | 0.07a   | 0.07a   | 0.014            | 0.600                        | 0.570             | <0.001                |
| ASV2257                                              | 0.00a                         | 0.05b   | 0.01a   | 0.01a   | 0.002            | 0.000                        | 0.470             | <0.001                |
| ASV2266                                              | 0.03b                         | 0.02 c  | 0.03a   | 0.01 d  | 0.000            | 0.990                        | 0.320             | <0.001                |
| ASV317                                               | 0.06b                         | 0.26a   | 0.13a,b | 0.21a   | 0.044            | 0.990                        | 0.120             | <0.001                |
| ASV562                                               | 0.13a                         | 0.06b   | 0.12a   | 0.1a    | 0.009            | 0.860                        | 0.120             | <0.001                |

<sup>1</sup> Values that do not share a common superscript are statistically different ( $P < 0.05$ ).

<sup>2</sup> Soaking the cereal fraction of the diet prior to feeding (fresh = 0h soaking, soak = 3h soaking).

<sup>3</sup> Enzyme supplementation with a xylanase and  $\beta$ -glucanase complex [unsupplemented (-), supplemented (+)].

<sup>4</sup> SEM = standard error of the mean.

<sup>5</sup> P-value corrected for false discovery rate (FDR).
